# Supplementary material for: Chemical Characterization and Bioactive Properties of Different Extracts from Fibigia clypeata, an Unexplored Plant Food
Source: Foods. 2020 Jun 1;9(6):705. doi: 10.3390/foods9060705 (PMC7353635; doi:10.3390/foods9060705)
Supplement: Supplementary file 1 [file foods-09-00705-s001.xlsx]

## Sheet: Pearson's correlations
Correlation's coefficients
		TPC	TFC	DPPH	ABTS	CUPRAC	FRAP	Chelating	Phospho	ACHE	BCHE	Tyrosinase	Amylase	Glucosidase
TPC	Pearson's correlation	1	,809**	,943**	,790*	,954**	,874**	-0.527	0.164	0.476	0.229	0.352	-0.014	0.322
	Sign. (two-tailed)		0.008	0	0.011	0	0.002	0.145	0.674	0.195	0.553	0.353	0.971	0.398
	N	9	9	9	9	9	9	9	9	9	9	9	9	9
TFC	Pearson's correlation	,809**	1	,876**	0.433	,782*	0.606	-,902**	0.559	,870**	,705*	,795*	0.491	,771*
	Sign. (two-tailed)	0.008		0.002	0.244	0.013	0.084	0.001	0.118	0.002	0.034	0.01	0.18	0.015
	N	9	9	9	9	9	9	9	9	9	9	9	9	9
DPPH	Pearson's correlation	,943**	,876**	1	,813**	,982**	,913**	-0.611	0.119	0.535	0.279	0.408	0.017	0.372
	Sign. (two-tailed)	0	0.002		0.008	0	0.001	0.081	0.759	0.138	0.468	0.276	0.966	0.325
	N	9	9	9	9	9	9	9	9	9	9	9	9	9
ABTS	Pearson's correlation	,790*	0.433	,813**	1	,894**	,979**	-0.062	-0.452	-0.051	-0.327	-0.199	-0.565	-0.237
	Sign. (two-tailed)	0.011	0.244	0.008		0.001	0	0.874	0.222	0.896	0.39	0.608	0.113	0.54
	N	9	9	9	9	9	9	9	9	9	9	9	9	9
CUPRAC	Pearson's correlation	,954**	,782*	,982**	,894**	1	,963**	-0.468	-0.022	0.391	0.116	0.251	-0.151	0.215
	Sign. (two-tailed)	0	0.013	0	0.001		0	0.204	0.955	0.298	0.767	0.515	0.699	0.578
	N	9	9	9	9	9	9	9	9	9	9	9	9	9
FRAP	Pearson's correlation	,874**	0.606	,913**	,979**	,963**	1	-0.258	-0.275	0.15	-0.129	0.002	-0.391	-0.037
	Sign. (two-tailed)	0.002	0.084	0.001	0	0		0.503	0.473	0.7	0.74	0.996	0.298	0.924
	N	9	9	9	9	9	9	9	9	9	9	9	9	9
Chelating	Pearson's correlation	-0.527	-,902**	-0.611	-0.062	-0.468	-0.258	1	-,766*	-,936**	-,908**	-,939**	-,755*	-,927**
	Sign. (two-tailed)	0.145	0.001	0.081	0.874	0.204	0.503		0.016	0	0.001	0	0.019	0
	N	9	9	9	9	9	9	9	9	9	9	9	9	9
Phospho	Pearson's correlation	0.164	0.559	0.119	-0.452	-0.022	-0.275	-,766*	1	,849**	,937**	,904**	,947**	,925**
	Sign. (two-tailed)	0.674	0.118	0.759	0.222	0.955	0.473	0.016		0.004	0	0.001	0	0
	N	9	9	9	9	9	9	9	9	9	9	9	9	9
ACHE	Pearson's correlation	0.476	,870**	0.535	-0.051	0.391	0.15	-,936**	,849**	1	,942**	,977**	,835**	,970**
	Sign. (two-tailed)	0.195	0.002	0.138	0.896	0.298	0.7	0	0.004		0	0	0.005	0
	N	9	9	9	9	9	9	9	9	9	9	9	9	9
BCHE	Pearson's correlation	0.229	,705*	0.279	-0.327	0.116	-0.129	-,908**	,937**	,942**	1	,985**	,946**	,986**
	Sign. (two-tailed)	0.553	0.034	0.468	0.39	0.767	0.74	0.001	0	0		0	0	0
	N	9	9	9	9	9	9	9	9	9	9	9	9	9
Tyrosinase	Pearson's correlation	0.352	,795*	0.408	-0.199	0.251	0.002	-,939**	,904**	,977**	,985**	1	,910**	,995**
	Sign. (two-tailed)	0.353	0.01	0.276	0.608	0.515	0.996	0	0.001	0	0		0.001	0
	N	9	9	9	9	9	9	9	9	9	9	9	9	9
Amylase	Pearson's correlation	-0.014	0.491	0.017	-0.565	-0.151	-0.391	-,755*	,947**	,835**	,946**	,910**	1	,928**
	Sign. (two-tailed)	0.971	0.18	0.966	0.113	0.699	0.298	0.019	0	0.005	0	0.001		0
	N	9	9	9	9	9	9	9	9	9	9	9	9	9
Glucosidase	Pearson's correlation	0.322	,771*	0.372	-0.237	0.215	-0.037	-,927**	,925**	,970**	,986**	,995**	,928**	1
	Sign. (two-tailed)	0.398	0.015	0.325	0.54	0.578	0.924	0	0	0	0	0	0
	N	9	9	9	9	9	9	9	9	9	9	9	9	9
** p < 0.01 (two-tailed)
* p < 0.05 (two-tailed)
